# Supplementary material for: Overcoming EGFR T790M-based Tyrosine Kinase Inhibitor Resistance with an Allele-specific DNAzyme
Source: PubMed Central journal article supplement — Mol Ther Nucleic Acids. 2014 Mar 4;3(3):e150–. doi: 10.1038/mtna.2014.3 (PMC3982196; doi:10.1038/mtna.2014.3), 2014-03-04
Supplement: mtna20143x1.pdf [file mtna20143x1.pdf]

**Figure S1**

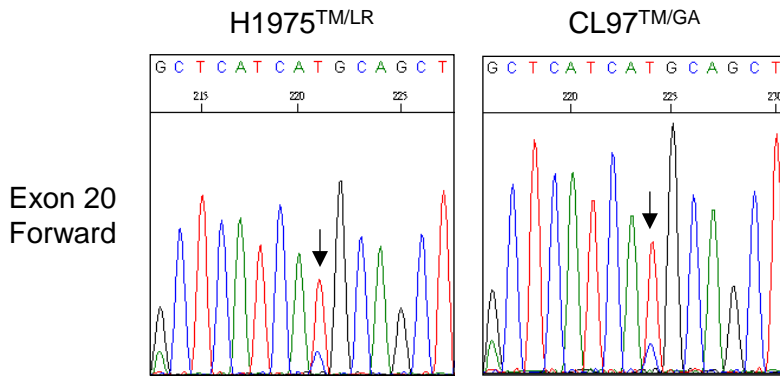

**Figure S1. The mutation status of EGFR exon 20 in H1975<sup>TM/LR</sup> and CL97<sup>TM/GA</sup> cell lines.** Genomic DNA of H1975<sup>TM/LR</sup> and CL97<sup>TM/GA</sup> cell lines were subjected to DNA sequencing. The arrows indicated that there is a C to T point mutation at nucleotide 2369 in both H1975<sup>TM/LR</sup> and CL97<sup>TM/GA</sup>.
