# Supplementary material for: Overcoming EGFR T790M-based Tyrosine Kinase Inhibitor Resistance with an Allele-specific DNAzyme
Source: PubMed Central journal article supplement — Mol Ther Nucleic Acids. 2014 Mar 4;3(3):e150–. doi: 10.1038/mtna.2014.3 (PMC3982196; doi:10.1038/mtna.2014.3), 2014-03-04
Supplement: mtna20143x2.pdf [file mtna20143x2.pdf]

**Figure S2**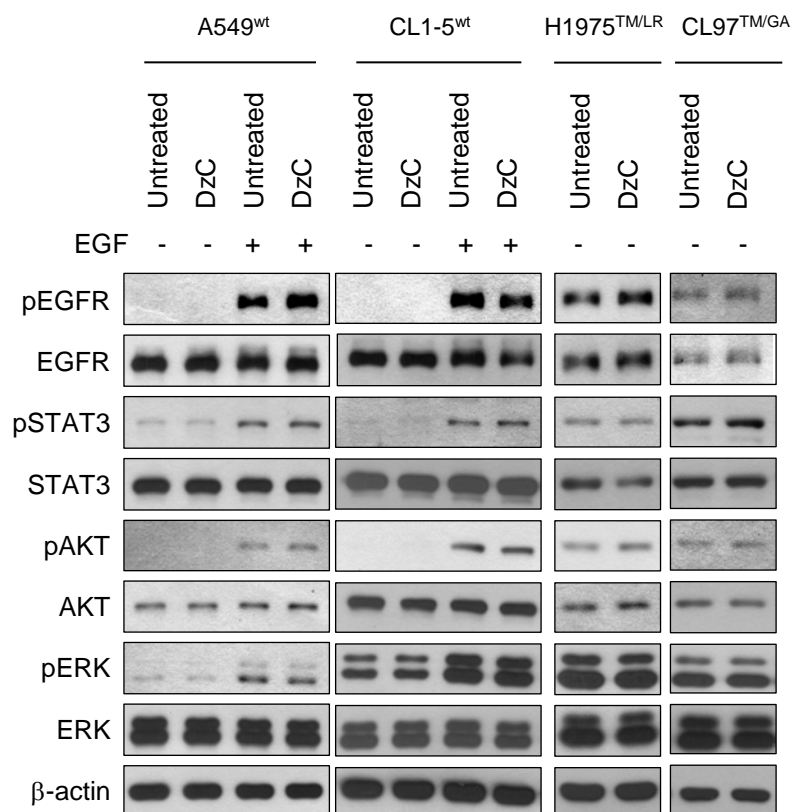

**Figure S2. EGFR expression and downstream signaling is unaffected by DzC treatment.** Cells without or with 100 nM DzC transfection were harvested 72 h after treatment. EGFR in wild-type cells was activated by adding 100 ng/ml EGF 15 min before cell lysates were harvested. Cell lysates were analyzed by immunoblotting with indicated primary antibodies.
