# Supplementary material for: Overcoming EGFR T790M-based Tyrosine Kinase Inhibitor Resistance with an Allele-specific DNAzyme
Source: PubMed Central journal article supplement — Mol Ther Nucleic Acids. 2014 Mar 4;3(3):e150–. doi: 10.1038/mtna.2014.3 (PMC3982196; doi:10.1038/mtna.2014.3), 2014-03-04
Supplement: mtna20143x3.pdf [file mtna20143x3.pdf]

**Figure S3**

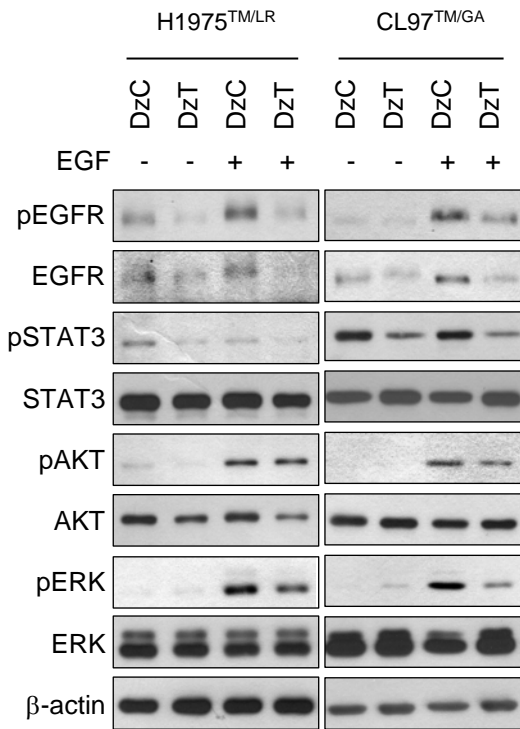

**Figure S3. DzT remains its suppression effect on EGFR T790M expression and downstream signaling after EGF treatment in T790M mutant cells.** Cells were harvested 72 h after transfecting with 100 nM DzC or DzT. 100 ng/ml EGF were added into culture medium 15 min before cell lysates were harvested. Cell lysates were analyzed by immunoblotting with indicated primary antibodies.
