# Supplementary material for: Overcoming EGFR T790M-based Tyrosine Kinase Inhibitor Resistance with an Allele-specific DNAzyme
Source: PubMed Central journal article supplement — Mol Ther Nucleic Acids. 2014 Mar 4;3(3):e150–. doi: 10.1038/mtna.2014.3 (PMC3982196; doi:10.1038/mtna.2014.3), 2014-03-04
Supplement: mtna20143x5.pdf [file mtna20143x5.pdf]

**Figure S5**

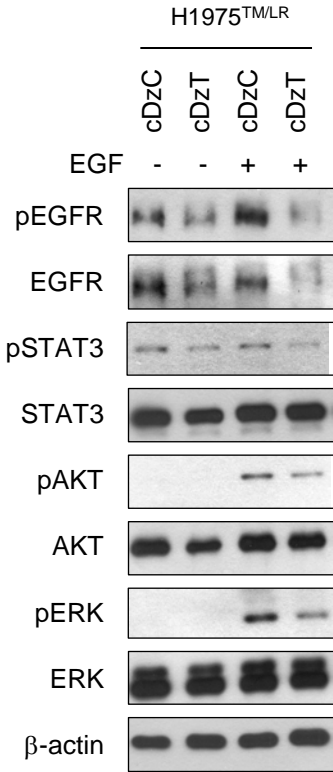

**Figure S5. cDzT remains its suppression effect on EGFR T790M expression and downstream signaling after EGF treatment in H1975<sup>TM/LR</sup>.** Cells were harvested 72 h after transfecting with 100 nM cDzC or cDzT. 100 ng/ml EGF were added into culture medium 15 min before cell lysates were harvested. Cell lysates were analyzed by immunoblotting with indicated primary antibodies.
