# Supplementary material for: Overcoming EGFR T790M-based Tyrosine Kinase Inhibitor Resistance with an Allele-specific DNAzyme
Source: PubMed Central journal article supplement — Mol Ther Nucleic Acids. 2014 Mar 4;3(3):e150–. doi: 10.1038/mtna.2014.3 (PMC3982196; doi:10.1038/mtna.2014.3), 2014-03-04
Supplement: mtna20143x6.pdf [file mtna20143x6.pdf]

**Figure S6**

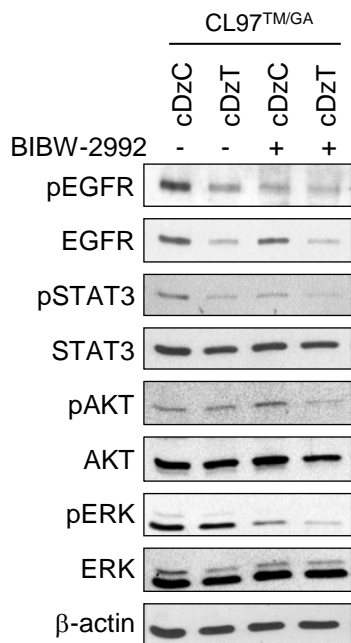

**Figure S6. Combined treatment of cDzT and BIBW-2992 significantly suppresses the phosphorylation of STAT3, AKT, and ERK in CL97<sup>TM/GA</sup> cells.** Immunoblot analysis of CL97<sup>TM/GA</sup> cells treated with cDzC or cDzT (50 nM) incubated with or without added BIBW-2992 (200 nM).
