# Supplementary material for: Overcoming EGFR T790M-based Tyrosine Kinase Inhibitor Resistance with an Allele-specific DNAzyme
Source: PubMed Central journal article supplement — Mol Ther Nucleic Acids. 2014 Mar 4;3(3):e150–. doi: 10.1038/mtna.2014.3 (PMC3982196; doi:10.1038/mtna.2014.3), 2014-03-04
Supplement: mtna20143x7.pdf [file mtna20143x7.pdf]

**Figure S7**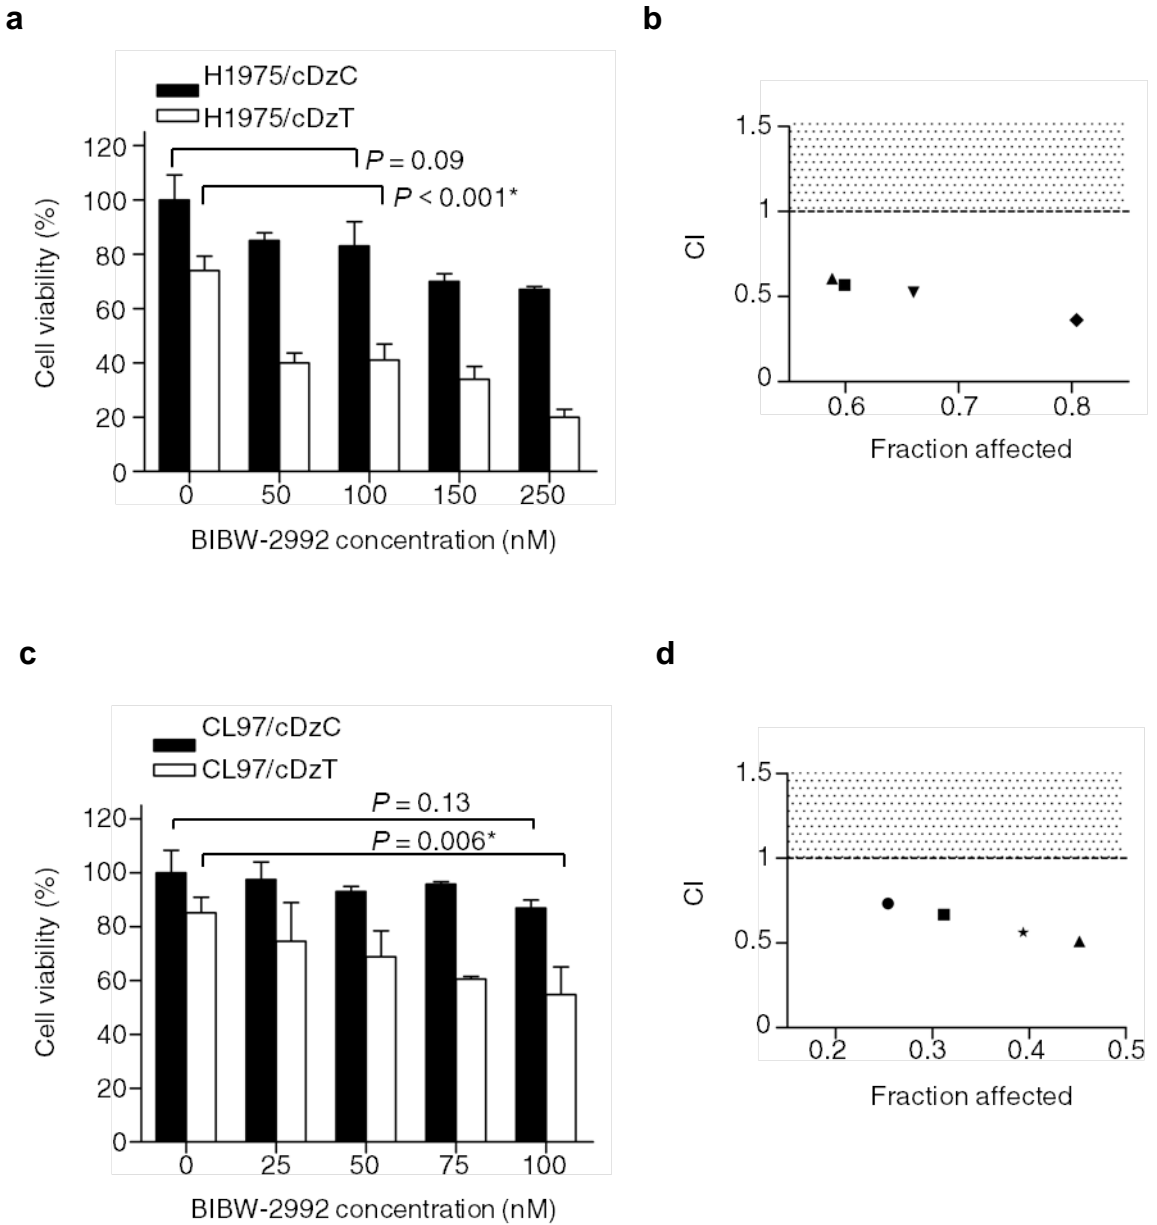

**Figure S7. Combined treatment of cDzT and BIBW-2992 exerts a synergistic inhibitory effect on cell viability in cells harboring EGFR T790M mutants.** MTT assay of H1975<sup>TM/LR</sup> cells (**a, b**) or CL97<sup>TM/GA</sup> cells (**c, d**) treated with cDzC or cDzT (25 nM) combined with 25 nM (●), 50 nM (■), 75 nM (★), 100 nM (▲), 150 nM (▼), or 250 nM (◆) BIBW-2992 ( $n = 3$ ). The data are presented as the means  $\pm$  SD. The results were analyzed by Student's *t*-test and CI calculation. An asterisk denotes statistical significant difference.
