# Supplementary material for: Overcoming EGFR T790M-based Tyrosine Kinase Inhibitor Resistance with an Allele-specific DNAzyme
Source: PubMed Central journal article supplement — Mol Ther Nucleic Acids. 2014 Mar 4;3(3):e150–. doi: 10.1038/mtna.2014.3 (PMC3982196; doi:10.1038/mtna.2014.3), 2014-03-04
Supplement: mtna20143x8.pdf [file mtna20143x8.pdf]

**Figure S8**

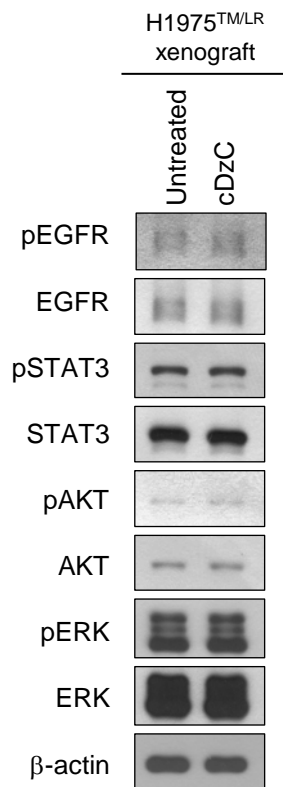

**Figure S8. EGFR expression and downstream signaling is unaffected in xenograft tissue after cDzC treatment.** Xenograft tumor tissues from PBS buffer group and cDzC treated group were processed for immunoblotting with indicated primary antibodies.
